# Supplementary material for: enDNA-Prot: Identification of DNA-Binding Proteins by Applying Ensemble Learning
Source: Biomed Res Int. 2014 May 26;2014:294279. doi: 10.1155/2014/294279 (PMC4058174; doi:10.1155/2014/294279)
Supplement: Supplementary file 1 — Supplementary Material S1 lists all the codes and sequences for the benchmark dataset. It contains 396 proteins, classified into 146 DNA-binding proteins and 250 non DNA-binding proteins. Supplementary Material S2 lists all the codes and sequences for the expanded benchmark dataset. It contains 2271 proteins, classified into 146 DNA-binding proteins and 2125 non DNA-binding proteins. Supplementary Material S3 lists all the codes and sequences for the independent dataset1. It contains 182 proteins, classified into 82 DNA-binding proteins and 100 non DNA-binding proteins. Supplementary Material S4 lists all the codes and sequences for the independent dataset2. It contains 1585 proteins, classified into 770 DNA-binding proteins and 815 non DNA-binding proteins. [file 294279.f1.zip]

Archive with 5 entries (4 files):
- 294279.f1/
- 294279.f1/S1.docx
- 294279.f1/S2.docx
- 294279.f1/S3.docx
- 294279.f1/S4.docx
